# Supplementary material
Source: publisher figshare collection journal article supplement (https://acs.figshare.com/ndownloader/files/3706651)
Supplement: Supplementary file 1 [file 3706651]

# Supporting Information

## **Torsional Linearity in Nonlinear Stress-Optical Regimes for Polymeric Materials**

Chunggi Baig

*School of Energy and Chemical Engineering, Ulsan National Institute of Science and  
Technology (UNIST), Ulsan 689-798, South Korea*

Author to whom correspondence should be addressed: Email: [cbaig@unist.ac.kr](mailto:cbaig@unist.ac.kr); Phone: +82-52-217-2538; Fax: +82-52-217-2649

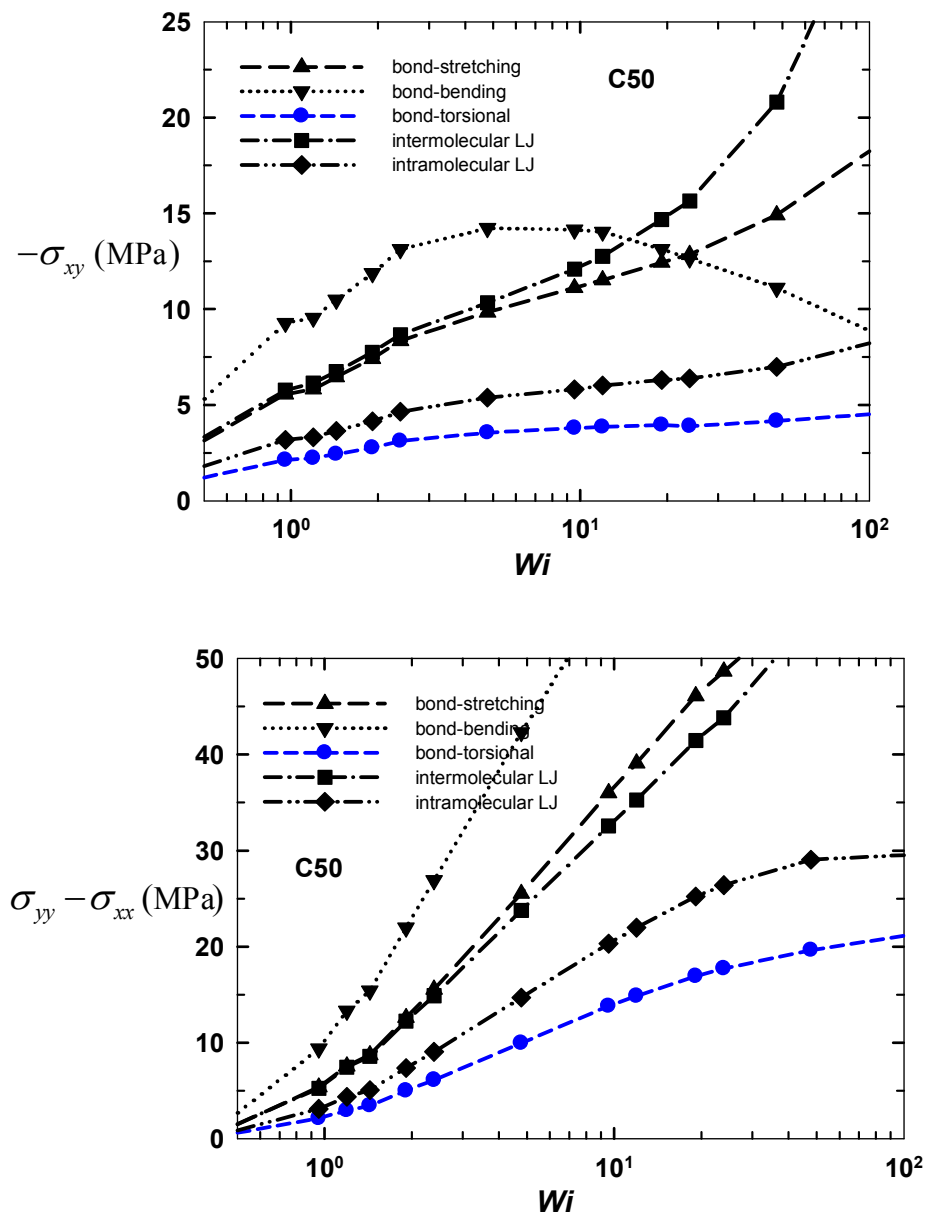

**Figure S1.** Plots of the stress tensor  $\sigma$  contributed by each individual interaction mode as a function of  $Wi$  number for the C<sub>50</sub>H<sub>102</sub> linear PE melt: (top) the  $xy$  component and (bottom) the  $(xx-yy)$  component.

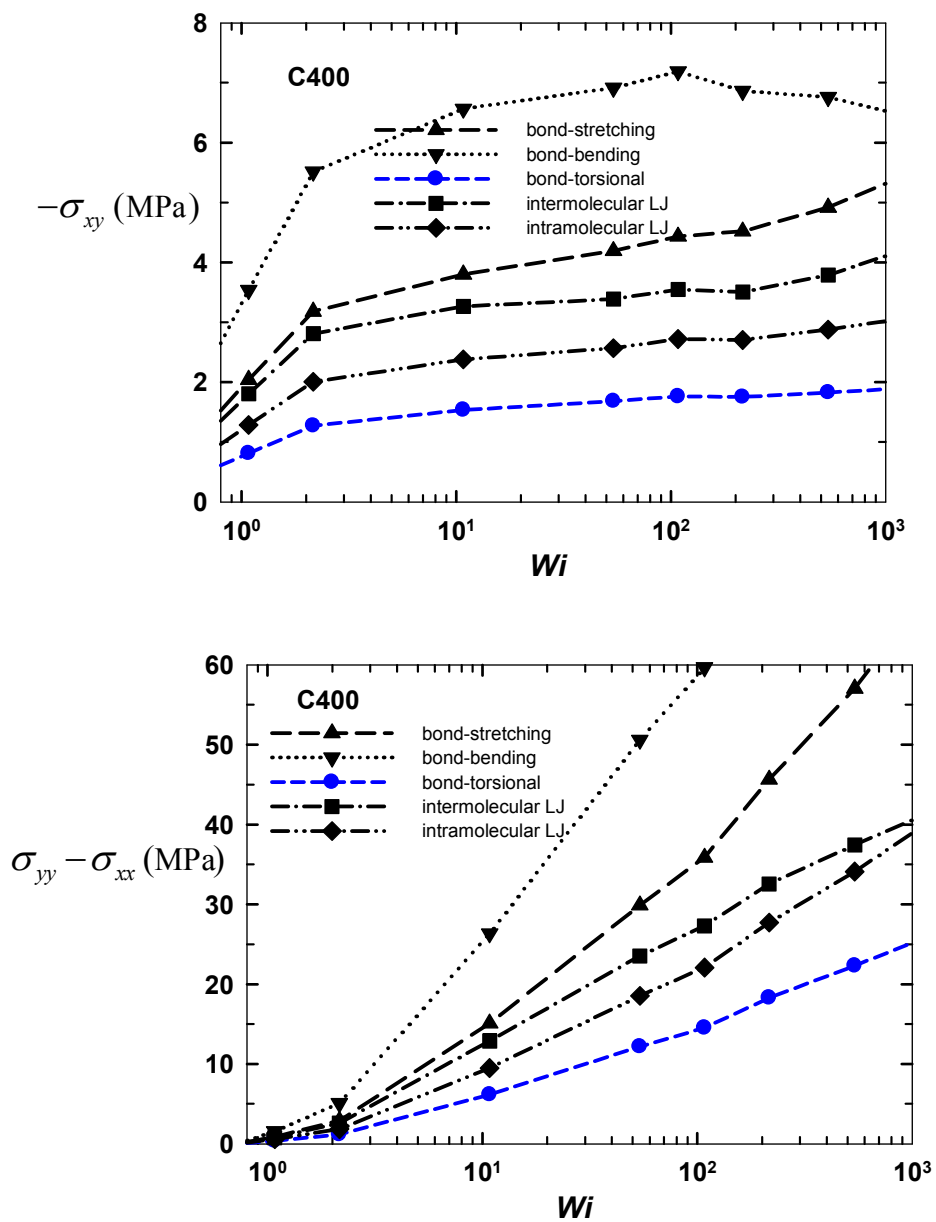

**Figure S2.** Same as with Figure S1, but for the C<sub>400</sub>H<sub>802</sub> linear PE melt.

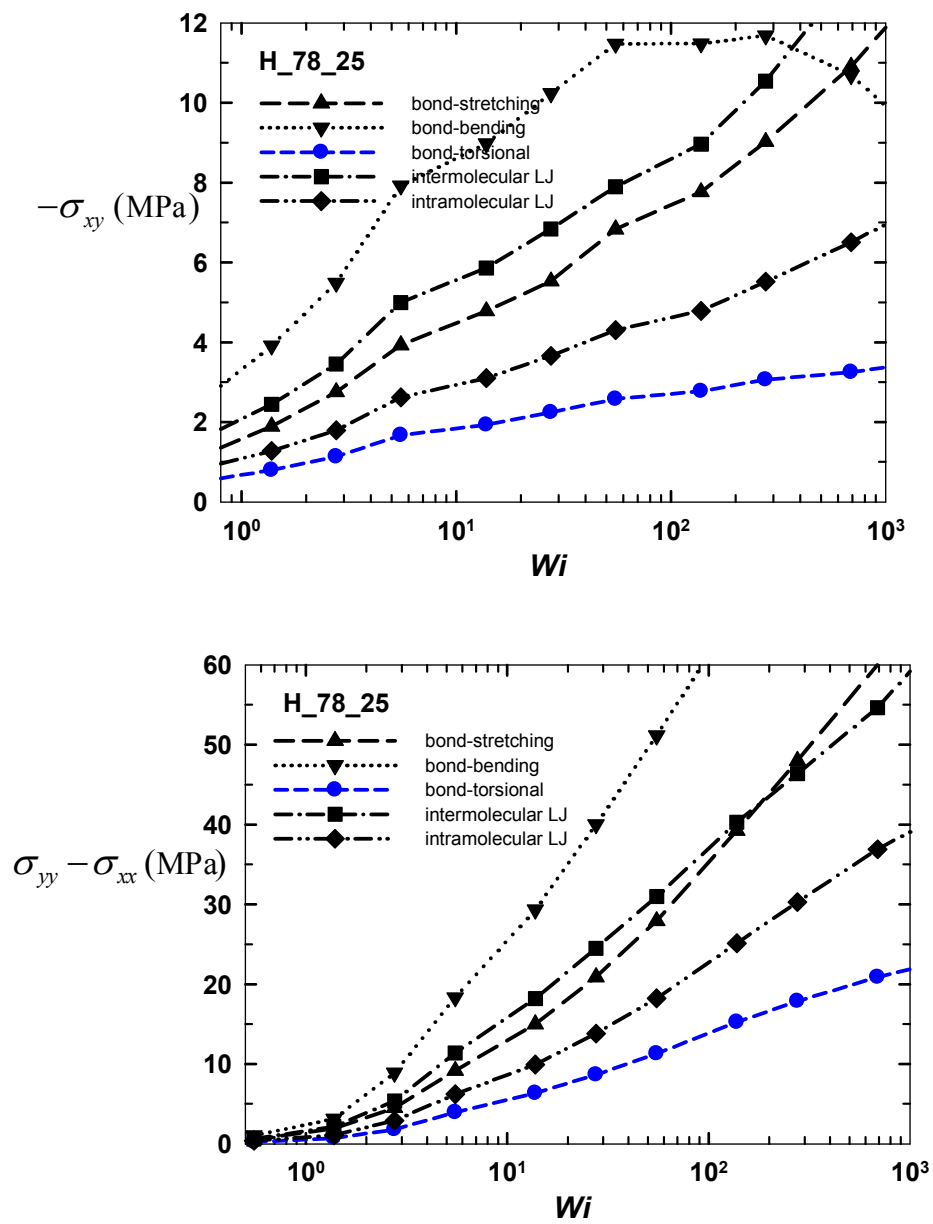

**Figure S3.** Same as with Figure S1, but for the H\_78\_25 PE melt.
